# Supplementary material for: Optimised use of passive samplers enabled early detection of SARS-CoV-2 variants BA.4 and BA.5 in sewage water
Source: Royal Society of Chemistry journal article supplement (doi:10.1039/d5ew00482a), 2025-11-20
Supplement: d5ew00482a1.pdf [file d5ew00482a1.pdf]

SUPPLEMENTARY TABLES AND FIGURES

**Table S1: Characteristics of the sequenced samples**

Sewage samples were collected at four sites (I-IV) in the sewer network of Lyon and Nantes with passive and grab sampling. Passive samplers were deployed for 24h.

Ct refers to the mean of three Ct values.

Coverage\_30 indicates the SARS-CoV-2 genome coverage at a depth of 30.

\* indicates that samples A-I and B-IV were not sequenced due to ineffective cDNA synthesis.

|            |                          |                        | SARS-CoV-2       |                      |                 |                  |               |                     |                 |                  | Norovirus GII    |                     |               |                     |
|------------|--------------------------|------------------------|------------------|----------------------|-----------------|------------------|---------------|---------------------|-----------------|------------------|------------------|---------------------|---------------|---------------------|
|            |                          |                        | Passive Sampling |                      |                 |                  | Grab sampling |                     |                 |                  | Passive Sampling |                     | Grab sampling |                     |
| Sites      | Date of passive sampling | Date of water sampling | Ct               | cRNA/membrane        | Coverage_30 (%) | Mapped reads (%) | Ct            | cRNA/10 mL          | Coverage_30 (%) | Mapped reads (%) | Ct               | cRNA/membrane       | Ct            | cRNA/10 mL          |
| Lyon-I     | 13-Apr-22                | 14-Apr-22              | 32.3             | 5.2x10 <sup>2</sup>  | 90              | 75.6             | 34.8          | 9.2x10 <sup>1</sup> | 86.6            | 64               | 28.5             | 0.8x10 <sup>4</sup> | 31.1          | 1.6x10 <sup>3</sup> |
|            | 15-Apr-22                | 15-Apr-22              | 33.5             | 2.4x10 <sup>2</sup>  | 93              | 69.2             | 35.1          | 7.4x10 <sup>1</sup> | *               | *                | 29.7             | 4.0x10 <sup>3</sup> | 27.5          | 1.7x10 <sup>4</sup> |
| Lyon-II    | 13-Apr-22                | 14-Apr-22              | 32.7             | 4.2x10 <sup>2</sup>  | 92              | 90.4             | 35.3          | 6.9x10 <sup>1</sup> | 88.3            | 62.9             | 26.0             | 4.2x10 <sup>4</sup> | 28.7          | 7.6x10 <sup>3</sup> |
|            | 15-Apr-22                | 15-Apr-22              | 31.7             | 7.8x10 <sup>2</sup>  | 93              | 89.1             | 34.3          | 1.3x10 <sup>2</sup> | 83              | 81.9             | 26.7             | 2.4x10 <sup>4</sup> | 27.5          | 1.7x10 <sup>4</sup> |
| Lyon-III   | 13-Apr-22                | 14-Apr-22              | 33.2             | 2.9x10 <sup>2</sup>  | 90              | 80.1             | 35.6          | 5.4x10 <sup>1</sup> | 87.1            | 90.4             | 28.2             | 1.2x10 <sup>4</sup> | 31.2          | 1.6x10 <sup>3</sup> |
|            | 15-Apr-22                | 15-Apr-22              | 33.4             | 2.5x10 <sup>2</sup>  | 92              | 87.6             | 35.5          | 6.0x10 <sup>1</sup> | 62.6            | 52.8             | 27.5             | 1.7x10 <sup>4</sup> | 29.5          | 4.5x10 <sup>3</sup> |
| Lyon-IV    | 13-Apr-22                | 14-Apr-22              | 32.8             | 3.5x10 <sup>2</sup>  | 95              | 86.7             | 33.3          | 2.5x10 <sup>2</sup> | 71.8            | 96               | 27.4             | 1.7x10 <sup>4</sup> | 29.0          | 6.2x10 <sup>3</sup> |
|            | 15-Apr-22                | 15-Apr-22              | 31.0             | 1.2x10 <sup>3</sup>  | 93              | 84.5             | 33.8          | 1.8x10 <sup>2</sup> | 90.5            | 90.3             | 26.9             | 2.4x10 <sup>4</sup> | 26.3          | 3.6x10 <sup>4</sup> |
| Nantes-I   | 18-May-22                | 17-May-22              | 34.7             | 1.1x10 <sup>2</sup>  | 94              | 88.3             | 31.9          | 6.4x10 <sup>2</sup> | 92.1            | 96.3             | 30.6             | 2.3x10 <sup>3</sup> | 29.4          | 4.9x10 <sup>3</sup> |
|            | 20-May-22                | 19-May-22              | 34.7             | 1.0x10 <sup>2</sup>  | 77              | 84               | 28.6          | 5.9x10 <sup>3</sup> | 95.3            | 96.2             | 29.5             | 4.6x10 <sup>3</sup> | 27.8          | 1.3x10 <sup>4</sup> |
| Nantes-II  | 18-May-22                | 17-May-22              | 34.7             | 1.1x10 <sup>2</sup>  | 85              | 78.9             | 33.7          | 1.9x10 <sup>2</sup> | 83.6            | 59.8             | 31.8             | 2.0x10 <sup>3</sup> | 30.3          | 2.7x10 <sup>3</sup> |
|            | 20-May-22                | 19-May-22              | 34.8             | 1.0x10 <sup>2</sup>  | 80              | 56               | 33.8          | 1.8x10 <sup>1</sup> | 90.2            | 78.1             | 30.4             | 5.5x10 <sup>3</sup> | 31.6          | 1.2x10 <sup>3</sup> |
| Nantes-III | 18-May-22                | 17-May-22              | 31.6             | 8.4x10 <sup>2</sup>  | 80.9            | 93.4             | 31.7          | 7.3x10 <sup>2</sup> | 96.3            | 93               | 31.2             | 1.6x10 <sup>3</sup> | 28.1          | 1.1x10 <sup>4</sup> |
|            | 20-May-22                | 19-May-22              | 34.0             | 1.4x10 <sup>2</sup>  | 94.4            | 76.1             | 36.0          | 4.0x10 <sup>1</sup> | 92.4            | 94.2             | 29.8             | 3.6x10 <sup>3</sup> | 31.3          | 1.4x10 <sup>3</sup> |
| Nantes-IV  | 18-May-22                | 17-May-22              | 35.4             | 0.71x10 <sup>2</sup> | *               | *                | 31.7          | 7.4x10 <sup>2</sup> | 95.4            | 94               | 30.0             | 3.3x10 <sup>3</sup> | 27.9          | 1.3x10 <sup>4</sup> |
|            | 20-May-22                | 19-May-22              | 34.4             | 1.3x10 <sup>2</sup>  | 90.9            | 74.6             | 30.5          | 1.7x10 <sup>3</sup> | 93.7            | 93               | 29.6             | 4.3x10 <sup>3</sup> | 29.3          | 5.5x10 <sup>3</sup> |

**Figure S1: The frequency of mutations in the SARS-CoV-2 genome**

The frequency and distribution of mutations in the genome are shown for passive and grab samples for both cities. ORF1ab: nt 266 – 13 468; S gene: nt 21 563 – 25 384.

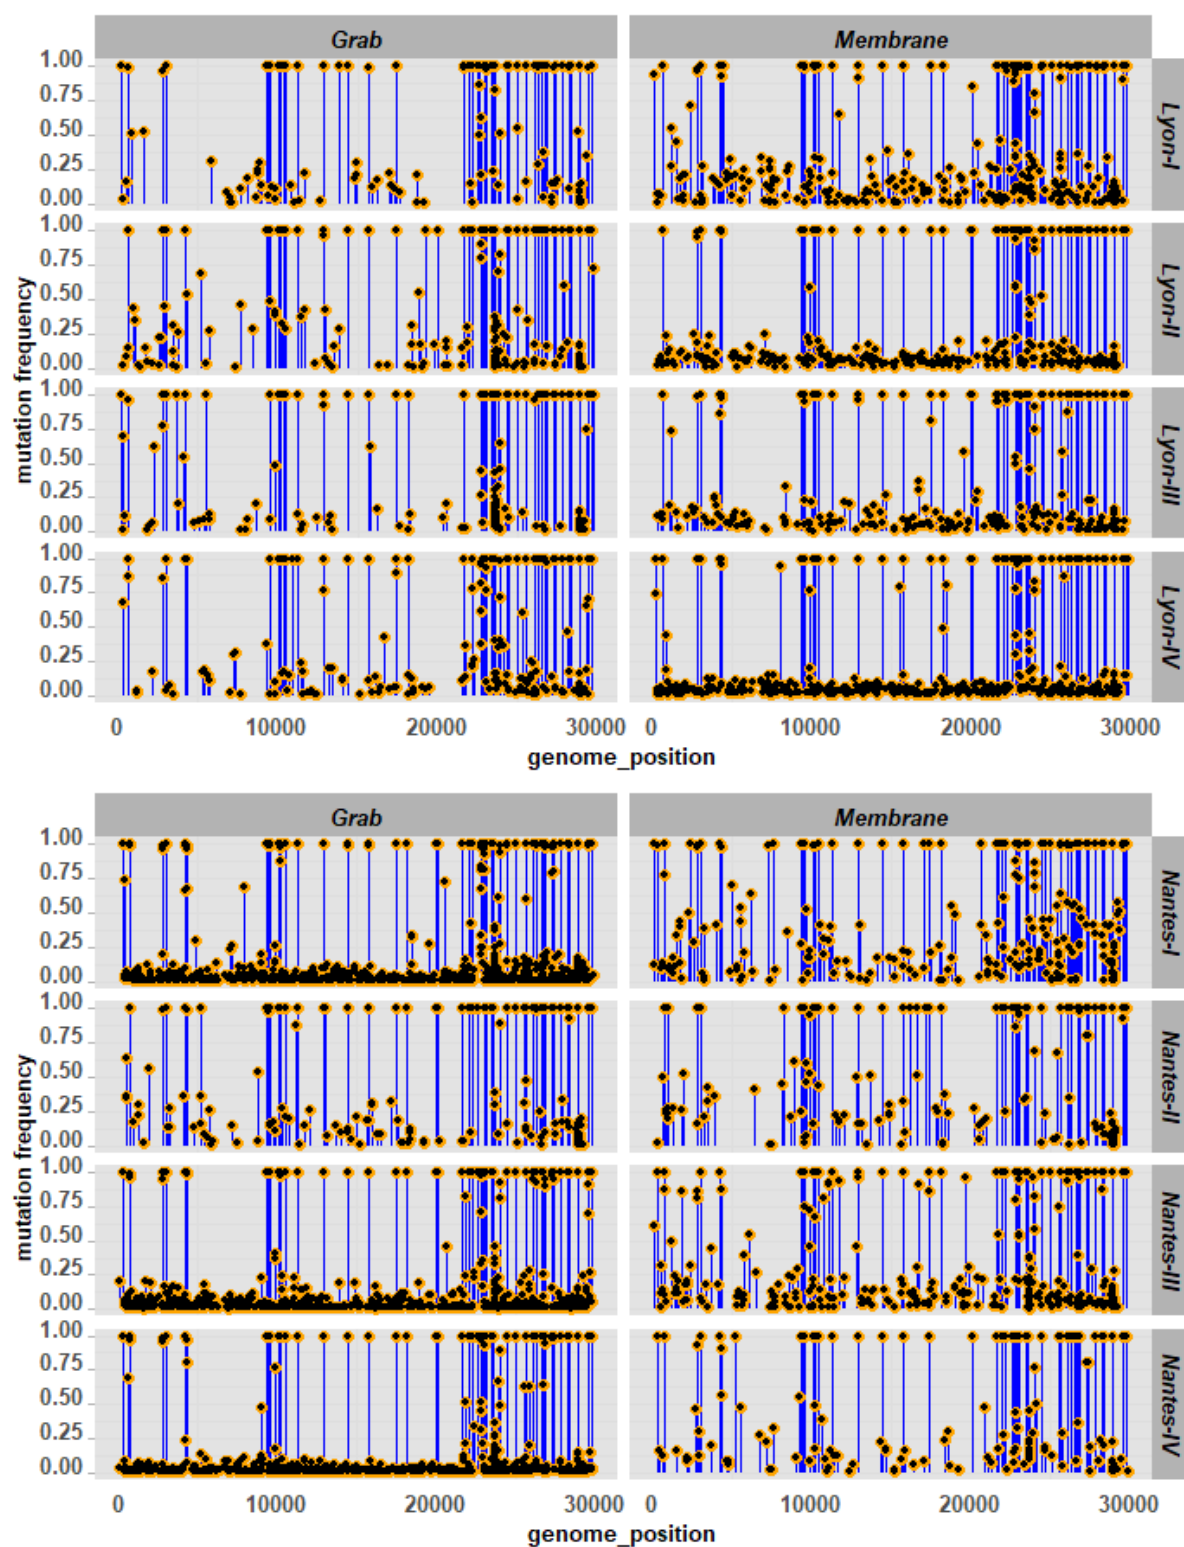

**Figure S2: Heatmap of the frequencies of mutations detected in the S gene**

The x-axis shows that the signature mutations of Omicron BA.2 and BA.4/5 are non-synonymous; the arrows indicate new mutations.

On the y-axis, a group of four lines corresponds to samples from the same site (sites I-IV) in the same city, including two series for membranes and grab samples (eg. Mb1 refers to: membrane series 1 and G1 refers to grab series 1). White indicates that no mutation was detected after applying quality filtering (frequency = 1%, depth = 30).

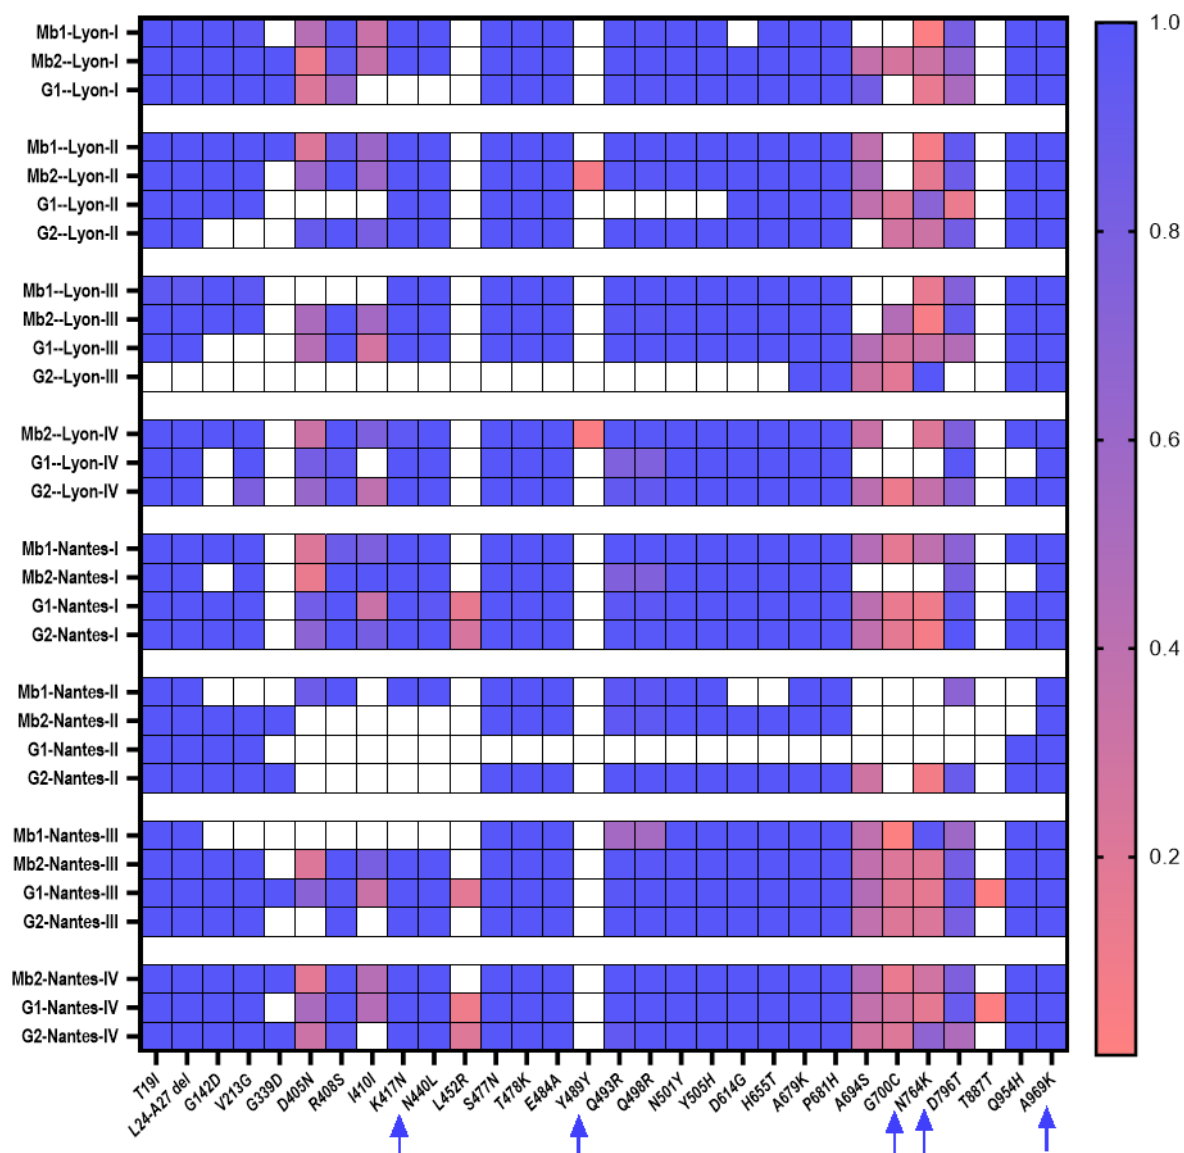

**Table S2: Workflow of Environmental monitoring, quantitative RT-PCR and sequencing analysis**

Assays performed for environmental monitoring of sewage, RT-qPCR analysis, storage of RNA samples and sequencing data analysis.

| Assay                                                 | Description                                                                                                                                                                                                                                                                                                                      | Reference                              |
|-------------------------------------------------------|----------------------------------------------------------------------------------------------------------------------------------------------------------------------------------------------------------------------------------------------------------------------------------------------------------------------------------|----------------------------------------|
| Passive sampling device                               | Nylon membrane, 100 µm pore size (Ø 8.5 cm), inserted into a 3D-printed device (COSCa) designed for SARS-CoV-2 detection.                                                                                                                                                                                                        | Refs. 17 & 21                          |
| Sampling design                                       | <b>Membrane-based passive sampling (referenced as membrane):</b> Deployment of COSCa devices for 24 h in 2 French cities (Lyon, Nantes), 4 sites per city, 2 sampling series.<br>Transported at 4°C.<br><b>Sewage grab sampling:</b> Complementary to passive sampling, 1 L grab samples collected per site, transported at 4°C. | Section 2.2                            |
| Virus recovery optimisation                           | Comparison of methods: (i) elution with Tween 20 (Tris-HCl buffer) ± sonication (3 × 1 min) + direct lysis (bioMérieux), (ii) direct lysis (bioMérieux). Three independent experiments, 2 biological replicates each.                                                                                                            | Section 2.3                            |
| Nucleic acid extraction from passive and grab samples | <b>Membrane samples:</b> Direct lysis using NucliSENS kit (bioMérieux).<br>Grab samples: concentration of virus using ultracentrifugation + Nuclisens (bioMérieux).<br>Mengovirus (MgV) spiked as process control. Treated with inhibitor removal kit (Zymo). Eluted in 100 µl nuclease-free water.                              | bioMérieux; Zymo; Qiagen; refs. 21, 35 |
| Virus process control                                 | Mengovirus (murine picornavirus) used as extraction control and PCR inhibition assessment as recommended in the ISO 15216-1.                                                                                                                                                                                                     | Section 2.4; ref. 45                   |

|                             |                                                                                                                                                                                                                                                                                         |                                                            |
|-----------------------------|-----------------------------------------------------------------------------------------------------------------------------------------------------------------------------------------------------------------------------------------------------------------------------------------|------------------------------------------------------------|
| <b>RT-qPCR assay</b>        | Detection of SARS-CoV-2 (IP4, polymerase gene) and NoV GII. UltraSense One-Step qRT-PCR kit (Invitrogen). Triplicates, negative amplification control included. Quantification using standard curves (CNR-Pasteur RNA transcript for SARS-CoV-2, synthetic DNA fragment for NoV GII.4). | refs. 36–38                                                |
| <b>RNA storage</b>          | Frozen at –80°C immediately after RT-qPCR and until ARTIC PCR within 6 months.                                                                                                                                                                                                          |                                                            |
| <b>Sequencing assay</b>     | cDNA synthesized with SuperScript IV. ARTIC PCR for amplicons sequencing V4.1 (98 amplicons, ~400 bp). Libraries prepared with NEBNext Ultra II (Illumina). Sequencing on MiSeq (2×250 cycles, 15% PhiX).                                                                               | ARTIC v4.1, ref. 39                                        |
| <b>Sequence analysis</b>    | ASPICov pipeline for alignment, coverage, and variant calling. S gene mutation analysis ( $\geq 1\%$ frequency). Alignment to SARS-CoV-2 reference (NM908947.2). VaRaPS and VirPool for deconvolution of lineages in mixed samples.                                                     | ASPICov v1.1.7, ref. 40; VaRaPS, ref. 41; VirPool, ref. 42 |
| <b>Statistical analysis</b> | Comparison of recovery methods with Student's t test, Spearman correlation for grab vs membrane, ANOVA for Ct vs coverage at 30X and for lineage diversity. RStudio (4.2.2) and GraphPad Prism v10.                                                                                     | Section 2.8                                                |
